# Supplementary material for: Ejaculation Frequency and Prostate Cancer: CAPLIFE Study
Source: PubMed Central journal article supplement — World J Mens Health. 2023 Mar 27;41(3):724–33. doi: 10.5534/wjmh.220216 (PMC10307655; doi:10.5534/wjmh.220216), 2023-03-27
Supplement: wjmh-41-724-s001.pdf [file wjmh-41-724-s001.pdf]

**Supplement Table 1.** Characteristics of controls and PCa cases according to EF a year before the interview in the CAPLIFE study

| EF (ejaculations/mo)                   | Controls            |                     |                    | PCa cases           |                     |                     | p-value <sup>a</sup> |
|----------------------------------------|---------------------|---------------------|--------------------|---------------------|---------------------|---------------------|----------------------|
|                                        | 0-3                 | 4                   | >4                 | 0-3                 | 4                   | >4                  |                      |
| Total                                  | 225 (52.7)          | 91 (21.3)           | 111 (26.0)         | 300 (65.8)          | 87 (19.1)           | 69 (15.1)           |                      |
| Age (y)                                | 70.0 (64.1-74.2)    | 65.2 (60.6-69.4)    | 61.7 (53.6-66.6)   | 70.0 (64.8-75.0)    | 65.8 (59.8-69.4)    | 72.1 (67.0-74.3)    | 0.001                |
| 40-54                                  | 4 (1.8)             | 6 (6.6)             | 31 (27.9)          | 8 (2.7)             | 9 (10.3)            | 11 (15.9)           |                      |
| 55-69                                  | 108 (48.0)          | 63 (69.2)           | 63 (56.8)          | 140 (46.7)          | 61 (70.1)           | 45 (65.2)           |                      |
| 70-80                                  | 113 (50.2)          | 22 (24.2)           | 17 (15.3)          | 152 (50.6)          | 17 (19.6)           | 13 (18.9)           |                      |
| Education                              |                     |                     |                    |                     |                     |                     | 0.011                |
| Primary                                | 75 (33.3)           | 20 (22.0)           | 26 (23.4)          | 109 (36.3)          | 20 (23.0)           | 12 (17.4)           |                      |
| Secondary                              | 112 (49.8)          | 49 (53.8)           | 53 (47.8)          | 141 (47.0)          | 52 (59.8)           | 43 (62.3)           |                      |
| University                             | 38 (16.9)           | 22 (24.2)           | 32 (28.8)          | 50 (16.7)           | 15 (17.2)           | 14 (20.3)           |                      |
| Marital status                         |                     |                     |                    |                     |                     |                     | 0.505                |
| Married                                | 195 (86.7)          | 72 (79.1)           | 87 (78.4)          | 252 (84.0)          | 73 (83.9)           | 54 (78.3)           |                      |
| Not married                            | 30 (13.3)           | 19 (20.9)           | 24 (21.6)          | 48 (16.0)           | 14 (16.1)           | 15 (21.7)           |                      |
| Height (cm)                            | 169.0 (165.0-172.0) | 170.0 (166.0-175.0) | 172. (167.0-176.0) | 169.0 (165.0-173.5) | 170.0 (167.0-175.0) | 171.0 (168.0-176.0) | 0.011                |
| BMI                                    |                     |                     |                    |                     |                     |                     | 0.868                |
| Normal weight                          | 39 (17.3)           | 16 (17.6)           | 20 (18.0)          | 61 (20.3)           | 17 (19.5)           | 17 (24.7)           |                      |
| Overweight                             | 118 (52.4)          | 55 (60.4)           | 56 (50.5)          | 154 (51.3)          | 46 (52.9)           | 31 (44.9)           |                      |
| Obesity                                | 68 (30.2)           | 20 (22.0)           | 35 (31.5)          | 85 (28.4)           | 24 (27.6)           | 21 (30.4)           |                      |
| Smoking status                         |                     |                     |                    |                     |                     |                     | 0.338                |
| Never smoker                           | 59 (26.2)           | 22 (24.2)           | 29 (26.1)          | 76 (25.3)           | 24 (27.6)           | 16 (23.2)           |                      |
| Former smoker                          | 128 (56.9)          | 50 (54.9)           | 60 (54.1)          | 160 (53.3)          | 51 (58.6)           | 34 (49.3)           |                      |
| Current smoker                         | 38 (16.9)           | 19 (20.9)           | 22 (19.8)          | 64 (21.4)           | 12 (13.8)           | 19 (27.5)           |                      |
| Sedentary behavior (h/d)               | 8.0 (6.0-10.0)      | 6.0 (5.0-9.0)       | 6.0 (4.0-9.0)      | 7.0 (5.0-10.0)      | 6.0 (5.0-10.0)      | 7.0 (5.0-10.0)      | 0.451                |
| Physical activity (MET-h/wk)           | 27.6 (9.0-40.4)     | 23.1 (9.9-34.7)     | 23.1 (9.9-41.6)    | 23.1 (6.6-34.7)     | 23.1 (9.9-45.0)     | 23.1 (4.8-40.0)     | 0.567                |
| Alcohol consumption (g/d) <sup>b</sup> |                     |                     |                    |                     |                     |                     | 0.064                |
| 0                                      | 48 (23.2)           | 10 (12.0)           | 13 (12.9)          | 61 (21.7)           | 9 (11.1)            | 6 (10.5)            |                      |
| 0-28                                   | 143 (69.1)          | 58 (69.9)           | 78 (77.2)          | 175 (62.3)          | 61 (75.3)           | 39 (68.4)           |                      |
| ≥ 28                                   | 16 (7.7)            | 15 (18.1)           | 10 (9.9)           | 45 (16.0)           | 11 (13.6)           | 12 (21.1)           |                      |
| Energy intake (kcal/d) <sup>b</sup>    | 2,256.2             | 2,329.5             | 2,353.7            | 2,336.2             | 2,517.9             | 2,526.1             | 0.193                |
|                                        | (1,928.4-2,711.8)   | (2,052.9-2,996.9)   | (1,958.0-3,015.0)  | (2,000.1-2,911.9)   | (2,173.8-2,955.8)   | (2,080.7-2,863.7)   |                      |
| First-degree family history of PCa     |                     |                     |                    |                     |                     |                     | 0.139                |
| No                                     | 201 (89.3)          | 82 (90.1)           | 99 (89.2)          | 243 (81.0)          | 63 (72.4)           | 50 (72.5)           |                      |
| Yes                                    | 24 (10.7)           | 9 (9.9)             | 12 (10.8)          | 57 (19.0)           | 23 (26.4)           | 19 (27.5)           |                      |
| Unknown                                | -                   | -                   | -                  | -                   | 1 (1.1)             | -                   |                      |

Supplement Table 1. Continued

| EF (ejaculations/mo) | Controls   |           |           | PCa cases  |           |           | p-value <sup>a</sup> |
|----------------------|------------|-----------|-----------|------------|-----------|-----------|----------------------|
|                      | 0-3        | 4         | >4        | 0-3        | 4         | >4        |                      |
| Diabetes mellitus    |            |           |           |            |           |           | 0.042                |
| No                   | 165 (73.3) | 67 (73.6) | 94 (84.7) | 230 (76.7) | 76 (87.4) | 59 (85.5) |                      |
| Yes                  | 59 (26.2)  | 24 (26.4) | 17 (15.3) | 70 (23.3)  | 11 (12.6) | 10 (14.5) |                      |
| Unknown              | 1 (0.4)    | -         | -         | -          | -         | -         |                      |
| Vasectomy            |            |           |           |            |           |           | 0.002                |
| Yes                  | 210 (93.3) | 85 (93.4) | 93 (83.8) | 283 (94.3) | 77 (88.5) | 56 (81.2) |                      |
| No                   | 15 (6.7)   | 6 (6.6)   | 18 (16.2) | 17 (5.7)   | 9 (10.3)  | 13 (18.8) |                      |
| Missing              | -          | -         | -         | -          | 1 (1.1)   | -         |                      |
| Urinary symptoms     |            |           |           |            |           |           | 0.566                |
| Without              | -          | -         | -         | 79 (26.3)  | 24 (27.6) | 20 (29.0) |                      |
| Mild                 | -          | -         | -         | 112 (37.3) | 32 (36.8) | 33 (47.8) |                      |
| Moderate             | -          | -         | -         | 84 (28.0)  | 25 (28.7) | 13 (18.8) |                      |
| Severe               | -          | -         | -         | 24 (8.0)   | 6 (6.9)   | 3 (4.4)   |                      |
| Unknown              | -          | -         | -         | 1 (0.3)    | -         | -         |                      |
| ISUP                 |            |           |           |            |           |           | 0.211                |
| 1-2                  | -          | -         | -         | 220 (73.3) | 70 (80.5) | 56 (81.2) |                      |
| 3-5                  | -          | -         | -         | 80 (26.7)  | 17 (19.5) | 13 (18.8) |                      |
| Stage of PCa         |            |           |           |            |           |           | 0.036                |
| Localized            | -          | -         | -         | 249 (83.0) | 80 (92.0) | 65 (94.2) |                      |
| Locally advanced     | -          | -         | -         | 30 (10.0)  | 6 (6.9)   | 3 (4.4)   |                      |
| Metastatic           | -          | -         | -         | 21 (7.0)   | 1 (1.1)   | 1 (1.4)   |                      |

Values are presented as number (%) or median (interquartile range).

BMI: body mass index, EF: ejaculation frequency, ISUP: International Society of Urological Pathology, PCa: prostate cancer.

<sup>a</sup>Kruskal-Wallis test or chi-squared test were used to calculate the differences between EF categories in PCa cases and controls.

<sup>b</sup>Dietary information was available for a total of 391 controls and 419 PCa cases.
