# Supplementary material for: Ejaculation Frequency and Prostate Cancer: CAPLIFE Study
Source: PubMed Central journal article supplement — World J Mens Health. 2023 Mar 27;41(3):724–33. doi: 10.5534/wjmh.220216 (PMC10307655; doi:10.5534/wjmh.220216), 2023-03-27
Supplement: wjmh-41-724-s002.pdf [file wjmh-41-724-s002.pdf]

**Supplement Table 2.** Association between EF in different decades of life and PCa risk in CAPLIFE study

| EF (ejaculations/mo) | Model 1          | Model 2          | Model 3          |
|----------------------|------------------|------------------|------------------|
| EF at 20s            |                  |                  |                  |
| >4                   |                  | Reference        |                  |
| 4                    | 1.83 (0.96–3.51) | 1.81 (0.94–3.47) | 1.93 (0.98–3.82) |
| 0–3                  | 1.85 (0.55–6.26) | 1.83 (0.54–6.23) | 1.72 (0.48–6.15) |
| p-trend              | 0.053            | 0.061            | 0.061            |
| EF at 30s            |                  |                  |                  |
| >4                   |                  | Reference        |                  |
| 4                    | 1.86 (0.89–3.97) | 1.91 (0.90–4.06) | 2.03 (0.93–4.45) |
| 0–3                  | 1.47 (0.32–6.73) | 1.37 (0.30–6.38) | 1.49 (0.31–7.14) |
| p-trend              | 0.128            | 0.136            | 0.106            |
| EF at 40s            |                  |                  |                  |
| >4                   |                  | Reference        |                  |
| 4                    | 0.83 (0.59–1.16) | 0.82 (0.58–1.14) | 0.88 (0.62–1.26) |
| 0–3                  | 0.77 (0.32–1.83) | 0.70 (0.29–1.68) | 0.68 (0.27–1.71) |
| p-trend              | 0.231            | 0.172            | 0.321            |

Values are presented as adjusted odds ratio (95% confidence interval).

EF: ejaculation frequency, PCa: prostate cancer.

Model 1: adjusted for age, educational level, and first-degree family history of PCa.

Model 2: adjusted for age, educational level, first-degree family history of PCa, height, sedentary behavior, diabetes mellitus, and vasectomy.

Model 3: adjusted for age, educational level, first-degree family history of PCa, height, sedentary behavior, diabetes mellitus, vasectomy, energy intake and alcohol consumption.
